1 **Mitogenome diversity of *Aedes (Stegomyia) albopictus*: Detection of multiple**  
2 **introduction events in Portugal and potential within-country dispersal**

3

4 Running title: **Mitogenome diversity of *Aedes albopictus* in Portugal**

5

6 Líbia Zé-Zé<sup>1,2¶\*</sup>, Vítor Borges<sup>3¶</sup>, Hugo Costa Osório<sup>1,4</sup>, Jorge Machado<sup>5</sup>, João Paulo Gomes<sup>3</sup>, Maria

7 João Alves<sup>1,4</sup>

8

9 **1** Centre for Vectors and Infectious Diseases Research, Department of Infectious Diseases,  
10 National Institute of Health Doutor Ricardo Jorge, Águas de Moura, Portugal

11

12 **2** BioISI - Biosystems & Integrative Sciences Institute, Faculty of Sciences, University of Lisbon,  
13 Portugal

14

15 **3** Bioinformatics Unit, Department of Infectious Diseases, National Institute of Health Doutor  
16 Ricardo Jorge, Lisbon, Portugal

17

18 **4** Instituto de Saúde Ambiental, Faculdade de Medicina da Universidade de Lisboa, Lisbon,  
19 Portugal

20

21 **5** Department of Infectious Diseases, National Institute of Health Doutor Ricardo Jorge, Lisbon,  
22 Portugal

23

24 \*Corresponding author

25 E-mail: [libia.zeze@insa.min-saude.pt](mailto:libia.zeze@insa.min-saude.pt)

26

27 ¶These authors contributed equally to this work.

## 28 **Abstract**

29 *Aedes albopictus*, along with *Ae. aegypti*, are key arbovirus vectors that have been expanding  
30 their geographic range over the last decades. In 2017, *Ae. albopictus* was detected for the first  
31 time at two distinct locations in Portugal. In order to understand how the *Ae. albopictus*  
32 populations recently introduced in Portugal are genetically related and which is their likely route  
33 of invasion, we performed an integrative cytochrome C oxidase I gene (COI)- and mitogenome-  
34 based phylogeographic analysis of mosquitoes samples collected in Portugal in 2017 and 2018  
35 in the context of the global *Ae. albopictus* diversity. COI-based analysis (31 partial sequences  
36 obtained from 83 mosquitoes) revealed five haplotypes (1 to 5), with haplotype 1 (which is  
37 widely distributed in temperate areas worldwide) being detected in both locations. Haplotypes  
38 2 and 3 were exclusively found in Southern region (Algarve), while haplotype 4 and 5 were only  
39 detected in the North of Portugal (Penafiel, Oporto region). Subsequent high discriminatory  
40 analyses based on *Ae. albopictus* mitogenome (17 novel sequences) not only confirmed a high  
41 degree of genetic variability within and between populations at both geographic locations  
42 (compatible with the *Ae. albopictus* mosquito populations circulating in Europe), but also  
43 revealed two mitogenome mutational signatures not previously reported at worldwide level.  
44 While our results generally sustain the occurrence of multiple introduction events, fine  
45 mitogenome sequence inspection further indicates a possible *Ae. albopictus* migration within  
46 the country, from the Northern introduction locality to the Southern region. In summary, the  
47 observed scenario of high *Ae. albopictus* genetic diversity in Portugal, together with the  
48 detection of mosquitoes in successive years since 2017 in Algarve and Penafiel, points that both  
49 *Ae. albopictus* populations seem to be already locally establish, as its presence has been  
50 reported for three consecutive years, raising the public health awareness for future mosquito-  
51 borne diseases outbreaks.

52

53

## 54 **Author Summary**

55 In 2017, *Aedes albopictus* was reported for the first time in Portugal at two distinct locations, in  
56 the premises of a tyre company in Penafiel, in the North, and nearby a golf course in Algarve, a  
57 tourism destination in the southernmost country region. The geographical spread of this species  
58 is boosted by larvae and desiccation-resistant eggs transport in aquatic trade goods, as tires and  
59 aquatic plants, and adult anthropophilic behavior that favors passive land transportation. In  
60 Portugal, especially in the Southern region, temperate climate conditions are adequate for adult  
61 mosquitoes survival most of the year. In a way to understand the genetic variability of *Ae.*  
62 *albopictus* populations introduced in Portugal, we analyzed 31 cytochrome C oxidase I gene  
63 (COI) partial sequences and 17 mitogenome sequences, integrating them in the context of the  
64 global *Ae. albopictus* phylogeographic diversity (i.e., 183 COI and 26 mitogenome sequences  
65 previously reported at worldwide level). Although COI haplotype 1 predominated, four  
66 additional haplotypes (2 to 5) were detected in Portugal. Subsequent in-depth mitogenome  
67 analysis revealed considerable genetic diversity, including not only sequences relating to  
68 mitogenomes reported mainly from Italy, Japan and China, but also two novel mitogenome  
69 mutational signatures.

70 Our study indicate that *Ae. albopictus* is locally established in Portugal and intra-country  
71 dispersal may have already happened, highlighting the challenges for vector surveillance and  
72 control programs aiming at restraining arbovirus disease burden in the future.

73

## 74 **Introduction**

75 *Aedes (Stegomyia) albopictus*, originally described by Skuse in 1894 from India, is one of the most  
76 invasive mosquito species that in the last 50 years has successfully colonized most of the tropical  
77 and temperate regions worldwide. In the 1970s its expansion was noticed in several islands in  
78 the Indian and Pacific Oceans (namely in the Hawaiian Islands) [1] and for the first time in  
79 Europe, in Albania, in 1979 [2]. In the 1980s, *Ae. albopictus* was reported in the Americas,

80 becoming established in Harris County, Texas, where it became a dominant vector species in  
81 Houston area [3], and in São Paulo, Brazil [4], and in Africa (first recorded in South Africa in 1989)  
82 [5]. The geographic range of this species increased dramatically in the 1990s. In Central America,  
83 the spread to Mexico also happened in the early 1990s [6, 7] and was confirmed by all countries  
84 in 2010 [5].

85 In Italy, it was detected in 1990, in the port of Genoa where it was introduced in a shipment of  
86 used tires from USA [8]. Italy is nowadays considered the most heavily-infested country in  
87 Europe, since *Ae. albopictus* become established in most areas of the country (less than 600 m  
88 above sea level) and is abundant in many urban areas [9].

89 Since the introduction in Italy, *Ae. albopictus* has been gradually spreading in Europe, and  
90 specially into most of the Mediterranean countries (S1 Fig). More recently, in 2017, this  
91 mosquito was reported in Portugal at two distinct locations, in a tyre company located in the  
92 North of Portugal, Penafiel (Oporto region) [10], and nearby a golf resort in the South, Algarve  
93 region [11]. Since then, its presence has been reported at the same locations continuously and  
94 its establishment and dispersal raises concern for autochthonous mosquito-borne disease  
95 outbreaks.

96 The worldwide successful expansion of *Ae. albopictus* has been promoted by unwilling transport  
97 of eggs in artificial and natural containers (with several introductions routed by used tires and  
98 Lucky bamboo trades), and to its anthropophilic behavior that promotes a close relation with  
99 humans and consequent passive transport via private or public ground vehicles [12, 13].

100 This impressive invasive capacity is undoubtedly associated to this species adaptive plasticity  
101 and the significant genetic population-based variation observed [14]. *Aedes albopictus* ability to  
102 inhabit temperate regions with relatively cold and dry climates is related to egg diapause which  
103 confers cold-hardiness, and is absent in tropical populations of this species, adapted to warm  
104 and wet climates [15]. In this sense, the risk of establishment is believed to be related to the

105 origin of the mosquitoes, since mosquito populations with egg diapause of temperate origins  
106 are more likely to establish in temperate latitudes [12].

107 *Aedes albopictus*, beyond being a nuisance species having considerable impact in environmental  
108 health and community welfare, is a competent vector species of a wide range of arboviruses and  
109 parasites, which raises the most concern in veterinary and public health. The transmission and  
110 spread of pathogenic flaviviruses such as Dengue, Zika, West Nile, Yellow fever and Japanese  
111 encephalitis viruses, alphaviruses like chikungunya virus, and also bunyaviruses as the La Crosse  
112 and Rift Valley fever viruses makes this mosquito a major global public health issue.

113 Autochthonous transmission of dengue and chikungunya has been reported in Europe related  
114 to *Ae. albopictus*, since 2007, when an outbreak of chikungunya with *circa* 330 suspected and  
115 confirmed cases occurred in the region of Emilia Romagna in Italy [16, 17]. More recently,  
116 chikungunya outbreaks have been reported in France in 2010 [18, 19], 2014 [20], and 2017 [21],  
117 and again, in Italy in 2017 [22]. Autochthonous dengue cases caused by dengue serotypes 1 and  
118 2 have also been reported in 2010 in Croatia [23] and France [24], and in France in 2013 [25],  
119 2014 [26] and 2015 [27]. In 2018, 12 cases of autochthonous dengue were confirmed in the EU,  
120 six in Spain (five in the region of Murcia and one in Catalonia) and six in France (five cases in  
121 Saint Laurent du Var, one case in Montpellier) [28].

122 In Portugal, a National Vector Surveillance Network—REVIVE (REde de VIGilância de VEctores)—  
123 is established since 2008 under the custody of the Portuguese Ministry of Health [29].  
124 Nowadays, the REVIVE network includes the General Directorate of Health (DGS), the five  
125 Regional Health Administrations (ARS) (namely Algarve, Alentejo, Lisboa e Vale do Tejo, Centro  
126 and Norte), the National Institute of Health Doutor Ricardo Jorge (INSA), and, in the outermost  
127 regions, the Institute of Health Administration of Madeira and the Regional Health Directorate  
128 of Azores. REVIVE carries out the nationwide surveillance of the most significant hematophagous  
129 arthropods in public health (mosquitoes, ticks, and sandflies). Surveillance of mosquito species  
130 and screening of field-collected mosquitoes for arboviruses is regularly performed. At airports,

131 ports, storage areas, and specific border regions with Spain, monitoring takes place throughout  
132 the year with the commitment of local and regional authorities.  
133 Mitochondrial DNA genes, namely cytochrome oxidase subunit I (COI) and NADH dehydrogenase  
134 subunit 5 (ND5), have been largely used to study the genetic relationships of *Ae. albopictus* [30-  
135 33] producing significant sequence data from most of the countries where this species has  
136 already been recorded. Mitochondrial DNA genes are ideal genetic markers to assess ancestry  
137 and demographic changes in populations [34] since their inheritance is uniparental (maternal in  
138 *Ae. albopictus*), recombination events are absent, they have high mutation and nucleotide  
139 substitution rates and a well-defined effective population size of one-fourth nuclear genes [34-  
140 36]. However, some limitations detected in COI and ND5 population studies show that the  
141 variation observed may be inadequate to identify and phylogenetically link haplogroups [37-39].  
142 In a way to overcome these constrains, Battaglia et al. [40] studied sequence variation in the  
143 entire coding regions of 27 mitogenomes and define five haplogroups in Asia, of which only  
144 three (A1a1, A1a2, and A1b) were likely to be related to the worldwide spread of the tiger  
145 mosquito.  
146 In order to understand how *Ae. albopictus* populations recently introduced in Portugal are  
147 genetically related and which is their likely route of invasion, we performed an integrative COI-  
148 and mitogenome-based phylogeographic analysis of mosquitoes collected in Portugal in 2017  
149 and 2018 in the context of the global *Ae. albopictus* diversity.

150

## 151 **Methods**

### 152 **Mosquito samples and DNA extraction**

153 In order to explore the mitogenome diversity, we analyzed nine *Aedes albopictus* mosquitoes  
154 from 12<sup>th</sup> September to 4<sup>th</sup> October 2017, and in 11<sup>th</sup> July 2018 in the premises of a tyre  
155 company, located in the metropolitan area of Oporto, municipality of Penafiel, and 17 *Ae.*  
156 *albopictus* females in Loulé municipality, Algarve region, from 12<sup>th</sup> July 2018 to 4<sup>th</sup> October 2018

157 (Table 1). All mosquito samples were collected by the national REVIVE surveillance network at  
158 public and private properties with the respective accountable/owners knowledge and  
159 permission. Samples for DNA extraction were selected individually and in pools (up to six  
160 mosquitoes). All these mosquitoes were previously identified at morphological [41, 42] and  
161 molecular (Osório et al. [10], and this work for mosquitos collected in 2018) levels. Additionally,  
162 7 and 60 mosquitos, collected in Algarve and Penafiel, respectively, from 26<sup>th</sup> September to 17<sup>th</sup>  
163 October 2018 were also molecularly identified using COI gene of mitochondrial DNA using  
164 primers LCO 1490 and HCO 2198 [43], as previously described [10]. Mosquito samples collected  
165 in 2018 were selected for mitogenome sequence using COI haplotype data.

166 Mosquitoes were grinded individually or in pools (up to 6 specimens) with a mortar and pestle  
167 with liquid nitrogen and 500 µL of minimal essential medium supplied with 10% FBS,  
168 streptomycin (0.1 mg/mL) and amphotericin B (1 mg/mL). An aliquot of 300 µL was preserved  
169 at -80°C and the remaining volume was further grinded 300 µL of Lysis Buffer (NUCLISENS®  
170 easyMAG, Biomérieux), added to the homogenizer cartridge (Invitrogen) and centrifuged at  
171 12,000g for 2 min to remove cellular debris and reduce lysate viscosity. Total nucleic acid  
172 extraction was performed using the prepared lysate suspensions in the automated platform  
173 NUCLISENS® easyMAG (Biomérieux).

#### 174 **Amplicon-based next-generation sequencing**

175 Mitochondrial coding regions (1-14,893 bp) were amplified according to the protocol described  
176 by Battaglia et al. [40] by the amplification of two long PCR fragments using primers 274F (5'AGC  
177 TAA CTC TTG ATT AGG GGC A3') and 8875R (5'TGT TGA GGC ACC TGT TTC AG3') for coding region  
178 1 (8.6 Kb), and 8415F (5'TTA AAG TCG GAG GAG CAG CT3') and 14717R (5'AAA TTT GTG CCA  
179 GCT ACC GC3') for coding region 2 (6.3 Kb). Long PCRs were carried out in 50 µL reaction mixtures  
180 with 1x AccuPrime™ PCR Buffer II (Invitrogen), 1 U of AccuPrime™ *Taq* DNA Polymerase High  
181 Fidelity (Invitrogen), 0.2 µM of each primer and 10-50 ng of template DNA. PCR conditions were  
182 as follows: denaturation at 94°C for 2 min, and 35 cycles of 94°C for 30s, 59°C for 30 s and 68°C

183 for 9 min, and final extension at 68°C for 5 min. Successful amplicons were screened on a 1.5%  
184 agarose gel and further purified using Agencourt AMPure XP PCR Purification kit before  
185 proceeding to Nextera XT DNA Library Preparation (Illumina), according to manufacture  
186 instructions. Libraries were subsequently sequenced (2 x 150 bp or 2 x 200 bp paired-end reads)  
187 using a MiSeq (Illumina) equipment.

## 188 **Data analysis**

189 Core bioinformatics analyses were conducted using INSaFLU (<https://insaflu.insa.pt/>), a web-  
190 based platform for amplicon-based NGS data analysis [44]. Briefly, the bioinformatics pipeline  
191 (detailed in Borges et al. [44]) involved: i) raw NGS reads quality analysis and improvement using  
192 FastQC v. 0.11.5 (<https://www.bioinformatics.babraham.ac.uk/projects/fastqc>) and  
193 Trimmomatic v. 0.27 [45] (<http://www.usadellab.org/cms/index.php?page=trimmomatic>),  
194 respectively; ii) reference-based mapping, consensus generation and variant detection using the  
195 multisoftware tool Snippy v. 3.2-dev (<https://github.com/tseemann/snippy>) (the captured  
196 sequence of the mitogenome of *Ae. albopictus* strain Rimini isolate 1#Rim1 haplogroup A1a1a1  
197 was used as reference; NCBI accession number KX383916; positions 283-14702); and, iii)  
198 alignment of consensus sequences using MAFFT v. 7.313 [46]  
199 (<https://mafft.cbrc.jp/alignment/software/>). Mean depth of coverage *per* sample ranged from  
200 ~450x to 1500x. Reads datasets generated during this study are available at the European  
201 Nucleotide Archive (Project accession number PRJEB32796). Detailed ENA accession numbers  
202 are described in S2 Table.

203 For the integration of mosquitos circulating in Portugal into the global *Ae. albopictus* genetic  
204 diversity, nucleotide consensus sequences of both COI gene and mitogenome were aligned  
205 against multiple sequences available at GenBank (183 COI and 26 mitogenome sequences  
206 previously reported at worldwide level; S1 and S2 Tables respectively) using MAFFT v. 7.313 [46].  
207 The obtained nucleotide alignments were manually inspected/corrected using MEGA 7.0 [47]  
208 (<https://www.megasoftware.net/>) and further used to build approximately-maximum-



209 likelihood phylogenetic trees applying the double-precision mode of FastTree2 under the  
210 General Time-Reversible (GTR) model (1000 bootstraps) [48]. The shared internal regions of the  
211 COI gene and mitogenome subjected to comparative genetic analyses in this study correspond  
212 to positions 1,511-2,080 and 283-14,653 of the reference mitogenome (Rimini isolate 1;  
213 GenBank accession number KX383916), respectively. *Aedes albopictus* metrics of genetic  
214 diversity including the number of polymorphic sites, haplotype diversity, and nucleotide  
215 diversity for COI and mitogenome sequences, for all determined sequences and for Oporto and  
216 Algarve populations were estimated using DnaSP v.5.0 [49].  
217 Phylogenetic data integration and visualization was performed using GrapeTree [50] and  
218 Microreact (also used for geospatial data visualization) [51].

219

## 220 **Results**

### 221 **COI haplotypes diversity in Portugal**

222 Thirty-one mtDNA COI partial sequences from 83 *Ae. albopictus* mosquitoes collected in  
223 Portugal were analyzed (GenBank accession numbers MF990905, MK995303-MK995332)  
224 representing five haplotypes (i.e. maternal lineages) and a total of four polymorphic sites (Table  
225 1). Estimated nucleotide diversity and haplotype diversity was higher in Algarve than in Oporto  
226 population ( $\pi= 0.00149$ ,  $Hd =0.6895$  vs  $\pi= 0.00043$ ,  $Hd =0.2747$ ).

227 Analysis of partial DNA sequences from the COI gene obtained from mosquitoes collected in  
228 Algarve (Southern Portugal) in 2018 confirmed the presence of three haplotypes (1, 2 and 3),  
229 and allowed the detection of two new haplotypes (4 and 5) in Penafiel (Northern Portugal) in  
230 2018, besides the haplotype 1 mosquito samples previously collected in this region in 2017  
231 (Table 1 and S2 Fig). Haplotype 1, which is shared in both regions, represents the most common  
232 and widely distributed in temperate areas (Fig 1, S2 Fig, Table 1 and S1 Table). The observed  
233 diversity detected in Portugal, considering the geospatial haplotype distribution in Europe (Fig

234 1B; S2 Fig), can be well explained by passive land-transportation from other European countries,  
235 especially from the Mediterranean countries.

### 236 **Mitogenome-based phylogeography of *Ae. albopictus***

237 A total of 17 novel mitogenomes coding sequences, 14 almost complete (14,370 – 14,420 bp;  
238 GenBank accessions MN513352-MN513359, MN513361, MN513362, MN513364-MN513366  
239 and MN513368) and three partial sequences (GenBank accessions MN513360, MN513363 and  
240 MN513367, for PoMo2709, PoMoF503 and PoMoF618, respectively) were determined in this  
241 study, representing nine different sequences (Table 1, S3 Table). Using mitogenome sequences,  
242 the estimated nucleotide diversity was higher in Algarve ( $\pi= 0.00052$  vs  $\pi= 0.00047$ ), but the  
243 haplotype diversity was higher in Oporto *Ae. albopictus* population ( $Hd =0.8056$  vs  $Hd =0.7500$ ).  
244 Sequence analysis confirms a high level of mitogenome diversity in both locations compatible  
245 with the *Ae. albopictus* mosquito populations circulating in Europe (Fig 2, S2 and S3 Tables).  
246 Overall, and as previously reported by Battaglia et al. [40] for most of mitogenomes circulating  
247 in temperate regions, the Portuguese mitogenome' sequences grouped within haplogroup A1.  
248 Specifically, (i) PoMo2600, PoMo2601, PoMo2604, PoMo2608 mitogenomes from Oporto  
249 cluster with mitogenomes from Italy and USA (A1a1a1a, using Battaglia et al. haplogroup  
250 designation), (ii) PoMo2728 and PoMoF636 mitogenomes from Algarve clusters with A1a1a  
251 mitogenome from Japan (J Wa1), (iii) PoMo2602 and PoMoF505 mitogenomes from Oporto  
252 clusters more closely with Chinese Foshan sequence, from a laboratory-maintained strain  
253 founded in 1981 from mosquitoes from Southeast China (A1a2), and (iv) PoMo2607  
254 mitogenome from Oporto clusters with Ath2 mitogenome from Greece (A1a2a) (Fig 2, S3 Table).  
255 Nevertheless, besides the mitogenome-based divergence reported previously [40], two novel  
256 sequence clusters were recovered represented respectively by two sequences, PoMoF506 and  
257 PoMoF607 from Algarve, and three sequences, PoMo2599 (2017, Oporto) and PoMo2711 and  
258 2708 (2018, Algarve) (Fig 2). The sequence variation observed in the latest group, enrolling  
259 similar sequences observed in the northern region in 2017, and posteriorly in the southern

260 region in 2018, may indicate a possible migration of *Ae. albopictus* within the country,  
261 compatible with the observed mutational and temporal profiles (S3 Table).

262

## 263 **Discussion and Conclusions**

264 Overall and as expected, the *Aedes albopictus* mosquitos collected in Portugal, in 2017 and 2018,  
265 are related to populations involved in the worldwide spread of this species through temperate  
266 regions. The genetic diversity observed at both locations, especially by mitogenome sequence  
267 analysis, indicates that the main introduction events were distinct and unrelated. However, the  
268 determination of a unique cluster of mitogenome sequences in Penafiel, Oporto in 2017  
269 (PoMo2599) and in Algarve in September of 2018 (PoMo2711 and PoMo2708) may indicate  
270 migration of *Ae. albopictus* in Portugal from Oporto to Algarve. Algarve region is a common  
271 vacation destination for Portuguese population, with increased travel in the summer season.  
272 Although in 2019, no additional collections sites for *Ae. albopictus* were, so far, reported by the  
273 REVIVE, the geographic spread within the country cannot be excluded. However, further  
274 mitogenome surveys enabling the access of sequences from mosquitoes collected in other  
275 European countries, namely in Spain are imperative to access a clear picture of this species  
276 geographic expansion.

277 In Penafiel (Northern location, Oporto region), the increased genetic diversity suggests multiple  
278 introduction events via tires transport. This hypothesis is supported by the detection of new  
279 distinct COI/mitogenome sequences in 2018 comparing with 2017. Despite several international  
280 connections by sea and sea ports in Portugal, representing high risk entry points, the pattern of  
281 genetic diversity observed in *Ae. albopictus* mosquitoes suggests that the introduction events  
282 detected at both sites/regions were promoted by passive land-transportation mainly from other  
283 European countries. In Penafiel, at the premises of the tyre company, the introduction event  
284 was most probably by immature stages, including eggs and larvae, and in Algarve most likely of  
285 adult mosquitoes by passive transport in public or private vehicles. Some tiger mosquitoes

286 mitogenome sequences detected in Penafiel in 2017 (PoMo2600, PoMo2601, PoMo2604 e  
287 PoMo2608) are identical to mitogenome sequences detected in Italy (Cassino, region of Lazio  
288 [40]; GenBank accession KX383921), indicating this country as the most probable origin of, at  
289 least, some of the mosquitoes populations introduced in Portugal. These results are in  
290 agreement with the general assumption that Italy is the geographic origin of the recent *Ae.*  
291 *albopictus* spread in Europe [52] and also corroborates the report by Osório et al. [10] of an *Ae.*  
292 *albopictus* Insect Specific Flavivirus (ISF) sequence detected in Penafiel in 2017 similar to ISF  
293 sequences detected previously in Italy.

294 From other perspective, the high genetic diversity perceived in our results prove the coexistence  
295 of different genetic sources, thus raising the hypothesis that such population plasticity can be  
296 enough to difficult eventual vector control strategies. Additionally, the detection of mosquitoes  
297 in successive years since 2017 in Algarve and Penafiel points that both *Ae. albopictus* populations  
298 seem to be already locally establish, as its presence has been reported for three consecutive  
299 years.

300 Furthermore, as vector spread is a key risk factor for arbovirus transmission, with arboviruses  
301 outbreaks typically occurring 5-15 years after *Ae. aegypti* or *Ae. albopictus* detection [52], the  
302 presence of *Ae. albopictus* in Portugal is a major public health threat, raising concern about the  
303 introduction of several arboviruses in the continent to the same level as already recognized in  
304 Madeira Island. In fact, *Ae. aegypti* present in Madeira since 2005 [53], was associated with the  
305 major dengue outbreak reported in Europe in 2012 [54].

306 Considering the emerging arboviruses (namely Dengue, Zika and Chikungunya viruses) and the  
307 rapid movement of viremic travelers, the risk of autochthonous cases in Europe is directly linked  
308 to the presence of *Aedes* vectors (especially during the summer season when vectorial capacity  
309 is sufficient to sustain transmission) and the number of travelers that arrive viremic increases  
310 [55]. A recent work by Massad et al. [55] estimates that Portugal received 71 dengue-viremic air  
311 passengers in 2012 (following Germany, France, United Kingdom, Italy and Spain with 167, 150,

312 148, 124 and 120 estimated dengue-viremic travelers, respectively). This estimate drops to 36  
313 when considering the monthly distribution of the arrivals of Dengue infected passengers from  
314 May to October (when vectorial capacity is higher in Portugal). However, in Algarve, which is the  
315 southernmost country region, and where more suitable climatic conditions with higher  
316 temperatures are observed, the vectorial capacity can be suitable from March-April, until  
317 November, when the estimate number of dengue-viremic travelers arriving raises to 64 [55].  
318 Regarding Algarve, the public health concern is thus particularly high, since this region is an  
319 important tourism destination in Europe. Moreover, when considering the expected number of  
320 dengue viremic air passengers arriving only from Brazil, Portugal is the third European country  
321 at high risk, receiving 68 dengue-viremic travelers (closely following France and Italy that are  
322 expected to receive 70 and 69 dengue-viremic travelers, respectively). In fact, this work by  
323 Massada and co-authors [55] points out the high risk of arbovirus introduction and occurrence  
324 of secondary autochthonous cases in Portugal, especially from Brazil.

325 In conclusion, our work, by providing an unprecedented and detailed picture of the genetic  
326 diversity of *Ae. albopictus* detected in Portugal, highlights the importance of surveillance at  
327 “hotspots” for mosquitoes introduction, as tires companies, and points of entry (borders, ports  
328 and airports), as well as the eventual implementation of vector control methods by the  
329 responsible authorities to prevent (new) introductions, establishments and dispersals within the  
330 country.

331 Considering recent prediction studies, habitat suitability for *Ae. albopictus* expansion is expected  
332 in Portugal from North to South [52]. In this scenario, the application of vector control measures  
333 and the maintenance of national entomological surveillance programs is crucial to effectively  
334 lower the risk of future autochthonous arbovirus cases (and outbreaks) in Portugal.

335

336

337

## 338 Acknowledgments

339 We are grateful to Marco Brustolin and Carles Aranda for proving the collection date and  
340 location in Spain of the sampled mosquitoes corresponding to haplotypes H1 to H8 COX1  
341 sequences (Genbank accessions KU319443-KU319450). We are also grateful to REVIVE team for  
342 the mosquito collection nationwide.

343

## 344 References

345

346 1. Estrada-Franco JG, Craig GB. *Biology, Disease Relationships, and Control of Aedes albopictus*.  
347 Washington, DC: Pan American Health Organization, 1995.

348

349 2. Adhami, J., Reiter, P. Introduction and establishment of *Aedes*. (*Stegomyia*.) *albopictus* Skuse  
350 (Diptera: Culicidae) in Albania. *J Am Mosq Control Assoc* 1998; 14:3403. PMID: 9813831

351

352 3. Sprenger D, Wuithiranyagool T. The discovery and distribution of *Aedes albopictus* in Harris County,  
353 Texas. *J Am Mosq Control Assoc* 1986; 2:217-9. PMID: 3507493

354

355 4. Forattini OP. 1986. Identificação de *Aedes* (*Stegomyia*) *albopictus* no Brasil. *Rev Saúde Publ São Paulo*  
356 20: 244-5. <https://dx.doi.org/10.1590/S0034-89101986000300009>

357

358 5. Bonizzoni M, Gasperi G, Chen X, James AA. The invasive mosquito species *Aedes albopictus*: current  
359 knowledge and future perspectives. *Trends in Parasitology* 2013; 29(9):460-8.  
360 <https://doi.org/10.1016/j.pt.2013.07.003> PMID: 23916878

361

362 6. Rai KS. *Aedes albopictus* in the Americas. *Annu Rev Entomol* 1991; 36:459-84.  
363 <https://doi.org/10.1146/annurev.en.36.010191.002331> PMID: 2006869

364

365 7. Lounibos LP. Invasion by insect vectors of human disease. *Ann Rev Entomol* 2002; 47:233-66.  
366 <https://doi.org/10.1146/annurev.ento.47.091201.145206> PMID: 11729075

367

368 8. Sabatini A, Raineri V, Trovato G, Coluzzi M. *Aedes albopictus* in Italia e possibile diffusione della specie  
369 nell' area mediterranea. *Parasitologia* 1990; 32:301-4. PMID: 2132441

370

371 9. Valerio L, Marini F, Bongiorno G, Facchinelli L, Pombi M, Caputo B, Maroli M, Della Torre A. Host-  
372 feeding patterns of *Aedes albopictus* (Diptera: Culicidae) in urban and rural contexts within

- 373 Romeprovince, Italy. Vector Borne Zoonotic Dis 2010; 10:291-4. <https://doi.org/10.1089/vbz.2009.0007>  
374 PMID: 19485771  
375
- 376 **10.** Osório HC, Zé-Zé L, Neto M, Silva S, Marques F, Silva AS, Alves MJ. Detection of the invasive mosquito  
377 species *Aedes (Stegomyia) albopictus* (Diptera: Culicidae) in Portugal Int J Environ Res Public  
378 Health 2018; 15:E820. <https://doi.org/10.3390/ijerph15040820> PMID: 29690531  
379
- 380 **11.** Marabuto E, Rebelo MT. The Asian tiger mosquito, *Aedes (Stegomyia) albopictus* (Skuse), a vector of  
381 dengue, chikungunya and zika viruses, reaches Portugal (Diptera: Culicidae). Zootaxa 2018;  
382 4413:197-200. <http://dx.doi.org/10.11646/zootaxa.4413.1.10> PMID: 29690129  
383
- 384 **12.** Benedict MQ, Levine RS, Hawley WA, Lounibos LP. Spread of the tiger: global risk of invasion by the  
385 mosquito *Aedes albopictus*. Vector Borne Zoonotic Dis 2007; 7:76-85. [https://doi.org/](https://doi.org/10.1089/vbz.2006.0562)  
386 10.1089/vbz.2006.0562 PMID: 17417960  
387
- 388 **13.** Medlock JM, Hansford KM, Schaffner F, Versteirt V, Hendrickx G, Zeller H, Van Bortel W. A review of  
389 the invasive mosquitoes in Europe: ecology, public health risks, and control options. Vector Borne  
390 Zoonotic Dis 2012; 12:435-47. <https://doi.org/10.1089/vbz.2011.0814> Epub 2012 Apr 20. PMID:  
391 22448724  
392
- 393 **14.** Chen X-G, Jiang X, Gu J, Xu M, Wu Y, Deng Y, et al. Genome sequence of the Asian Tiger  
394 mosquito, *Aedes albopictus*, reveals insights into its biology, genetics, and evolution. Proc Natl Acad  
395 Sci USA 2015; 112:E5907-15. <https://doi.org/10.1073/pnas.1516410112> PMID:26483478  
396
- 397 **15.** Hawley WA, Reiter P, Copeland RS, Pumpuni CB, Craig GB Jr. *Aedes albopictus* in North America:  
398 probable introduction in used tires from northern Asia. Science 1987; 236:1114-6.  
399 <https://doi.org/10.1126/science.3576225> PMID: 3576225  
400
- 401 **16.** Rezza R, Nicoletti L, Angelini R, Romi R, Finarelli AC, Panning M, et al. Infection with chikungunya  
402 virus in Italy: an outbreak in a temperate region. Lancet 2007; 30:1840-6.  
403 [https://doi.org/10.1016/S0140-6736\(07\)61779-6](https://doi.org/10.1016/S0140-6736(07)61779-6) PMID: 18061059  
404
- 405 **17.** Angelini R, Finarelli AC, Angelini P, Po C, Petropulacos K, Silvi G, et al. Chikungunya in north-eastern  
406 Italy: a summing up of the outbreak. Euro Surveill 2007;  
407 12:E071122.2. <https://doi.org/10.2807/esw.12.47.03313-en> PMID: 18053561  
408

- 409 **18.** Grandadam M, Caro V, Plumet S, Thiberge JM, Souares Y, Failloux AB, et al. Chikungunya virus,  
410 southeastern France. *Emerg Infect Dis* 2011; 17:910-3. <https://dx.doi.org/10.3201/eid1705.101873>  
411 PMID: 21529410  
412
- 413 **19.** Vega-Rua A, Zouache K, Caro V, Diancourt L, Delaunay P, Grandadam M, et al. High efficiency of  
414 temperate *Aedes albopictus* to transmit chikungunya and dengue viruses in the Southeast of France.  
415 *PloS one* 2013; 8:e59716. <https://doi.org/10.1371/journal.pone.0059716> PMID: 23527259  
416
- 417 **20.** Delisle E, Rousseau C, Broche B, Leparç-Goffart I, L'Ambert G, Cochet A, et al. Chikungunya outbreak  
418 in Montpellier, France, September to October 2014. *Euro Surveill* 2015; 20:21108.  
419 <https://doi.org/10.2807/1560-7917.ES2015.20.17.21108> PMID: 25955774  
420
- 421 **21.** Calba C, Guerbois-Galla M, Franke F, Jeannin C, Auzet-Caillaud M, Grard G, et al. Preliminary report  
422 of an autochthonous chikungunya outbreak in France, July to September 2017. *Euro Surveill* 2017;  
423 22:17-00647. <https://doi.org/10.2807/1560-7917.ES.2017.22.39.17-00647> PMID: 29019313  
424
- 425 **22.** Manica M, Guzzetta G, Poletti P, Filipponi F, Solimini A, Caputo B, et al. Transmission dynamics of  
426 the ongoing chikungunya outbreak in Central Italy: from coastal areas to the metropolitan city of  
427 Rome, summer 2017. *Euro Surveill* 2017; 22:17-00685. <https://doi.org/10.2807/1560-7917.ES.2017.22.44.17-00685> PMID: 29113629  
428
- 429
- 430 **23.** Gjenero-Margan I, Aleraj B, Krajcar D, Lesnikar V, Klobucar A, Pem-Novosel I, et al. Autochthonous  
431 dengue fever in Croatia, August-September 2010. *Euro Surveill* 2011; 16:  
432 19805. <https://doi.org/10.2807/ese.16.09.19805-en> PMID: 21392489  
433
- 434 **24.** La Ruche G, Souares Y, Armengaud A, Peloux-Petiot F, Delaunay P, Despres P, et al. First two  
435 autochthonous dengue virus infections in metropolitan France, September 2010. *Euro Surveill* 2010;  
436 15:19676. <https://doi.org/10.2807/ese.15.39.19676-en> PMID: 20929659  
437
- 438 **25.** Marchand E, Prat C, Jeannin C, Lafont E, Bergmann T, Flusin O, et al. Autochthonous case of dengue  
439 in France, October 2013. *Euro Surveill* 2013; 18:20661. <https://doi.org/10.2807/1560-7917.ES2013.18.50.20661> PMID: 24342514  
440
- 441
- 442 **26.** Giron S, Rizzi J, Leparç-Goffart I, Septfons A, Tine R, Cadiou B, et al. New occurrence of autochthonous  
443 cases of dengue fever in southeast France, August-September 2014. *Bulletin épidémiologique*  
444 *hebdomadaire* 2015; 13-14:217.  
445



- 446 27. Succo T, Leparc-Goffart I, Ferre JB, Roiz D, Broche B, Maquart M, et al. Autochthonous dengue  
447 outbreak in Nimes, South of France, July to September 2015. *Euro Surveill* 2016; 21:30240.  
448 <https://doi.org/10.2807/1560-7917.ES.2016.21.21.30240> PMID: 27254729  
449
- 450 28. European Centre for Disease Prevention and Control. Local transmission of dengue fever in France  
451 and Spain – 2018 – 22 October 2018. Stockholm: ECDC; 2018.  
452 <https://ecdc.europa.eu/en/publications-data/rapid-risk-assessment-local-transmission-dengue->  
453 [fever-france-and-spain](https://ecdc.europa.eu/en/publications-data/rapid-risk-assessment-local-transmission-dengue-fever-france-and-spain)  
454
- 455 29. Osório HC, Zé-Zé L, Amaro F, Alves MJ. Mosquito surveillance for prevention and control of emerging  
456 mosquito-borne diseases in Portugal—2008—2014. *Int J Environ Res Public Health* 2014; 11:11583–  
457 96. <https://doi.org/10.3390/ijerph111111583> PMID: 25396768  
458
- 459 30. Žitko T, Kovačić A, Desdevises Y, Puizina J. Genetic variation in East-Adriatic populations of the Asian  
460 tiger mosquito, *Aedes albopictus* (Diptera: Culicidae), inferred from NADH5 and COI sequence  
461 variability. *Eur J Entomol* 2011; 108:501-8. <https://doi.org/10.14411/eje.2011.065>  
462
- 463 31. Beebe NW, Ambrose L, Hill LA, Davis JB, Hapgood G, Cooper RD, et al. Tracing the Tiger: Population  
464 Genetics Provides Valuable Insights into the *Aedes (Stegomyia) albopictus* Invasion of the  
465 Australasian Region. *PLoS Negl Trop Dis* 2013; 7:e2361.  
466 <https://doi.org/10.1371/journal.pntd.0002361> PMID:23951380  
467
- 468 32. Zhong D, Lo E, Hu R, Metzger ME, Cummings R, Bonizzoni M, et al. Genetic analysis of invasive *Aedes*  
469 *albopictus* populations in Los Angeles County, California and its potential public health impact. *PLoS*  
470 *One* 2013; 8:e68586. <https://doi.org/10.1371/journal.pone.0068586> PMID: 23861921  
471
- 472 33. Eskildsen GA, Rovira JR, Smith O, Miller MJ, Bennett KL, McMillan WO, Loaiza J. Maternal invasion  
473 history of *Aedes aegypti* and *Aedes albopictus* into the Isthmus of Panama: Implications for the  
474 control of emergent viral disease agents. *PLoS One* 2018; 13:e0194874.  
475 <https://doi.org/10.1371/journal.pone.0194874> PMID: 29579112  
476
- 477 34. Avise JC. Mitochondrial DNA polymorphism and a connection between Genetics and Demography of  
478 relevance to Conservation. *Conservation Biology* 1995; 9:686-90. <https://doi.org/10.1046/j.1523->  
479 [1739.1995.09030686.x](https://doi.org/10.1046/j.1523-1739.1995.09030686.x)  
480
- 481 35. Birungi J, Munstermann LE. Genetic Structure of *Aedes albopictus* (Diptera: Culicidae) Populations  
482 Based on Mitochondrial Nd5 Sequences: Evidence for an Independent Invasion into Brazil and United

- 483 States. *Annals of the Entomological Society of America* 2002; 95:125–  
484 32. [https://doi.org/10.1603/0013-8746\(2002\)095\[0125:GSOAAD\]2.0.CO;2](https://doi.org/10.1603/0013-8746(2002)095[0125:GSOAAD]2.0.CO;2)  
485
- 486 **36.** Usmani-Brown S, Cohnstaedt L, Munstermann LE. Population Genetics of *Aedes albopictus* (Diptera:  
487 Culicidae) Invading Populations, Using Mitochondrial nicotinamide Adenine Dinucleotide  
488 Dehydrogenase Subunit 5 Sequences. *Ann Entomol Soc Am* 2009; 102:144-50.  
489 <https://doi.org/10.1603/008.102.0116> PMID: 22544973  
490
- 491 **37.** Torroni A, Achilli A, Macaulay V, Richards M, Bandelt HJ. Harvesting the fruit of the human mtDNA  
492 tree. *Trends Genet* 2006; 22:339-45. <https://doi.org/10.1016/j.tig.2006.04.001> PMID: 16678300  
493
- 494 **38.** Achilli A, Olivieri A, Pellecchia M, Ubaldi C, Colli L, Al-Zahery N, et al. Mitochondrial genomes of  
495 extinct aurochs survive in domestic cattle. *Curr Biol* 2008; 18:R157-8.  
496 <https://doi.org/10.1016/j.cub.2008.01.019> PMID: 18302915  
497
- 498 **39.** Achilli A, Olivieri A, Soares P, Lancioni H, Kashani BH, Perego UA et al. Mitochondrial genomes from  
499 modern horses reveal the major haplogroups that underwent domestication. *Proc Natl Acad Sci USA*  
500 2012; 109:2449-54. <https://doi.org/10.1073/pnas.1111637109> PMID: 22308342  
501
- 502 **40.** Battaglia V, Gabrieli P, Brandini S, Capodiferro MR, Javier PA, Chen XG. The Worldwide Spread of the  
503 Tiger Mosquito as Revealed by Mitogenome Haplogroup Diversity. *Front Genet* 2016;  
504 7:208. <https://doi.org/10.3389/fgene.2016.00208> PMID: 27933090  
505
- 506 **41.** Ribeiro H, Ramos HC. Identification keys of the mosquitoes of Continental Portugal, Açores and  
507 Madeira. *Eur Mosq Bull* 1999; 3:1–11.  
508
- 509 **42.** Schaffner F, Angès G, Geoffroy B, Hervy J-P, Rhaïem A, Brunhes J. The mosquitoes of Europe: an  
510 identification and training programme 2001, Montpellier, France: IRD editions (CD-ROM).  
511
- 512 **43.** Folmer O, Black M, Hoeh W, Lutz R, Vrijenhoek R. DNA primers for amplification of mitochondrial  
513 Cytochrome C oxidase subunit I from diverse metazoan invertebrates *Molecular marine biology and*  
514 *biotechnology* 1994; 3:294-9.  
515
- 516 **44.** Borges V, Pinheiro M, Pechirra P, Guiomar R. Gomes JP. INSaFLU: an automated open web-based  
517 bioinformatics suite “from-reads” for influenza whole-genome-sequencing-based surveillance.  
518 *Genome Medicine* 2018; 10:46. <https://doi.org/10.1186/s13073-018-0555-0> PMID: 29954441  
519

- 520 **45.** Bolger AM, Lohse M, Usadel B. Trimmomatic: A flexible trimmer for Illumina Sequence  
521 Data. *Bioinformatics* 2014; 30:2114-20. <https://doi.org/10.1093/bioinformatics/btu170> PMID:  
522 24695404  
523
- 524 **46.** Katoh K, Misawa K, Kuma K, Miyata T. MAFFT: a novel method for rapid multiple sequence alignment  
525 based on fast Fourier transform. *Nucleic Acids Res* 2002; 30:3059-66.  
526 <https://doi.org/10.1093/nar/gkf436> PMID: 12136088  
527
- 528 **47.** Kumar S, Stecher G, Tamura K. MEGA/: Molecular evolutionary genetics analysis version 7.0 for  
529 bigger datasets. *Mol Biol Evol* 2016; 33:1870-4 <https://doi.org/10.1093/molbev/msw054> PMID:  
530 27004904  
531
- 532 **48.** Price MN, Dehal PS, Arkin AP FastTree 2 – Approximately Maximum-Likelihood Trees for Large  
533 Alignments. *PLoS ONE* 2010; 5:e9490. <https://doi.org/10.1371/journal.pone.0009490> PMID:  
534 20224823  
535
- 536 **49.** Librado P, Rozas J. DnaSP v5: A software for comprehensive analysis of DNA polymorphism data.  
537 *Bioinformatics* 2009; 25:1451-2. <https://doi.org/10.1093/bioinformatics/btp187> PMID: 19346325  
538
- 539 **50.** Zhou Z, Alikhan N-F, Sergeant MJ, Luhmann N, Vaz C, Francisco AP, Carriço JA, Achtman M.  
540 GrapeTree: visualization of core genomic relationships among 100,000 bacterial pathogens. *Genome*  
541 *Res* 2018; 28:1395-404. <https://doi.org/10.1101/gr.232397.117> PMID: 30049790  
542
- 543 **51.** Argimón S, Abudahab K, Goater RJE, Fedosejev A, Bhai J, Glasner C, Feil EJ, Holden MTG, Yeats CA,  
544 Grundmann H, Spratt BG, Aanensen DM. Microreact: visualizing and sharing data for genomic  
545 epidemiology and phylogeography. *Microbial Genomics* 2016; 2 (11): 1-11.  
546 <https://doi.org/10.1099/mgen.0.000093> PMID: 28348833  
547
- 548 **52.** Kraemer MUG, Reiner RC, Brady OJ, Messina JP, Gilbert M, Pigott DM, et al. Past and future spread  
549 of the arbovirus vectors *Aedes aegypti* and *Aedes albopictus*. *Nature Microbiol* 2019; 4:854-63.  
550 <https://doi.org/10.1038/s41564-019-0376-y> PMID:30833735  
551
- 552 **53.** Margarita Y, Santos Grácio AJ, Lencastre I, Silva AC, Novo T, Sousa C. First record of *Aedes*  
553 (*Stegomyia*) *aegypti* (Linnaeus, 1762) (Diptera, Culicidae) in Madeira Island—Portugal (Portuguese,  
554 English abstract). *Acta Parasitológica Portuguesa* 2006; 13:59–61.  
555
- 556 **54.** European Centre for Disease Prevention and Control. Dengue outbreak in Madeira, Portugal, March  
557 2013. Stockholm: ECDC; 2014 ISBN 978-92-9193-564-2

558 <https://ecdc.europa.eu/sites/portal/files/media/en/publications/Publications/dengue-madeira->  
559 [ECDC-mission-2013.pdf](#)

560

561 **55.** Massad E, Amaku M, Coutinho FAB, Struchiner CJ, Burattini MN, Khan K, et al. Estimating the  
562 probability of dengue virus introduction and secondary autochthonous cases in Europe. Sci Rep  
563 2018; 8:4629. <https://doi.org/10.1038/s41598-018-22590-5> PMID:29545610

1 **Table 1.** *Aedes albopictus* samples collected in Portugal.

| Original Designation            | COI GenBank ID | mitDNA GenBank ID | Collection Date | Collection Place | Region  | Nº Mosq | Mitogenome* | COI Haplotype |
|---------------------------------|----------------|-------------------|-----------------|------------------|---------|---------|-------------|---------------|
| PoMo1076 <sup>a</sup>           | MF990905       | ND                | 04/09/2017      | Penafiel         | Oporto  | 1       |             | 1             |
| PoMo2599                        | MK995303       | MN513352          | 04/10/2017      | Penafiel         | Oporto  | 1       | New 2       | 1             |
| PoMo2600                        | MK995304       | MN513353          | 02/10/2017      | Penafiel         | Oporto  | 1       | (A1a1a1a)   | 1             |
| PoMo2601                        | MK995305       | MN513354          | 02/10/2017      | Penafiel         | Oporto  | 1       | (A1a1a1a)   | 1             |
| PoMo2602                        | MK995306       | MN513355          | 04/10/2017      | Penafiel         | Oporto  | 1       | (A1a2)      | 1             |
| PoMo2604                        | MK995307       | MN513356          | 04/10/2017      | Penafiel         | Oporto  | 1       | (A1a1a1a)   | 1             |
| PoMo2607                        | MK995308       | MN513357          | 13/09/2017      | Penafiel         | Oporto  | 1       | (A1a2a)     | 1             |
| PoMo2608                        | MK995309       | MN513358          | 12/09/2017      | Penafiel         | Oporto  | 1       | (A1a1a1a)   | 1             |
| PoMo2605/2609/2611 <sup>b</sup> | MK995310       | ND                | 04/10/2017      | Penafiel         | Oporto  | 3       |             | 1             |
| PoMoF502                        | MK995311       | ND                | 11/07/2018      | Penafiel         | Oporto  | 1       |             | 1             |
| PoMo2708                        | MK995312       | MN513359          | 27/09/2018      | Almancil         | Algarve | 1       | New 2       | 1             |
| PoMo2711                        | MK995313       | MN513361          | 26/09/2018      | Almancil         | Algarve | 4       | New 2       | 1             |
| PoMo2713A                       | MK995314       | ND                | 08/10/2018      | Almancil         | Algarve | 2       |             | 1             |
| PoMo2724                        | MK995315       | ND                | 17/10/2018      | Penafiel         | Oporto  | 6       |             | 1             |
| PoMo2725A                       | MK995316       | ND                | 17/10/2018      | Penafiel         | Oporto  | 1       |             | 1             |
| PoMo2727                        | MK995317       | ND                | 04/10/2018      | Almancil         | Algarve | 6       |             | 1             |
| PoMoF607 <sup>c</sup>           | NA             | MN513366          | 04/10/2018      | Almancil         | Algarve | 1       | New 1       | 2             |
| PoMo2729B                       | MK995318       | ND                | 04/10/2018      | Almancil         | Algarve | 3       |             | 1             |
| PoMoF506                        | MK995319       | MN513365          | 12/07/2018      | Quarteira        | Algarve | 1       | New 1       | 2             |
| PoMo2710                        | MK995320       | ND                | 26/09/2018      | Almancil         | Algarve | 1       |             | 2             |
| PoMo2712A                       | MK995321       | ND                | 08/10/2018      | Almancil         | Algarve | 5       |             | 2             |
| PoMo2714                        | MK995322       | ND                | 04/10/2018      | Almancil         | Algarve | 6       |             | 2             |
| PoMo2725B                       | MK995323       | ND                | 04/10/2018      | Almancil         | Algarve | 5       |             | 2             |
| PoMo2726                        | MK995324       | ND                | 04/10/2018      | Almancil         | Algarve | 6       |             | 2             |
| PoMo2729A                       | MK995325       | ND                | 04/10/2018      | Almancil         | Algarve | 3       |             | 2             |
| PoMo2709                        | MK995326       | MN513360          | 27/09/2018      | Almancil         | Algarve | 3       | (A1a1a)     | 3             |
| PoMo2712B                       | MK995327       | ND                | 08/10/2018      | Almancil         | Algarve | 5       |             | 3             |
| PoMo2713B                       | MK995328       | ND                | 08/10/2018      | Almancil         | Algarve | 2       |             | 3             |
| PoMo2715                        | MK995329       | ND                | 04/10/2018      | Almancil         | Algarve | 6       | (A1a1a)     | 3             |
| PoMoF636 <sup>d</sup>           | NA             | MN513368          | 04/10/2018      | Almancil         | Algarve | 1       | (A1a1a)     | 3             |
| PoMo2728                        | MK995330       | MN513362          | 04/10/2018      | Almancil         | Algarve | 6       | (A1a1a)     | 3             |
| PoMoF618 <sup>e</sup>           | NA             | MN513367          | 04/10/2018      | Almancil         | Algarve | 1       | (A1a1a)     | 3             |
| PoMoF505                        | MK995331       | MN513364          | 11/07/2018      | Penafiel         | Oporto  | 1       | (A1a2)      | 4             |
| PoMoF503                        | MK995332       | MN513363          | 11/07/2018      | Penafiel         | Oporto  | 1       |             | 5             |

2 \*Mitogenome designation as defined by Battaglia et al. [40].

3 <sup>a</sup> [10]

4 <sup>b</sup>Sequence obtained from 3 mosquitos.

5 <sup>c</sup>Female mosquito analysed individually from pool PoMo2727.

6 <sup>d</sup>Female mosquito analysed individually from pool PoMo2715.

7 <sup>e</sup>Female mosquito analysed individually from pool PoMo2728.

8 NA – not applicable; ND – not determined.

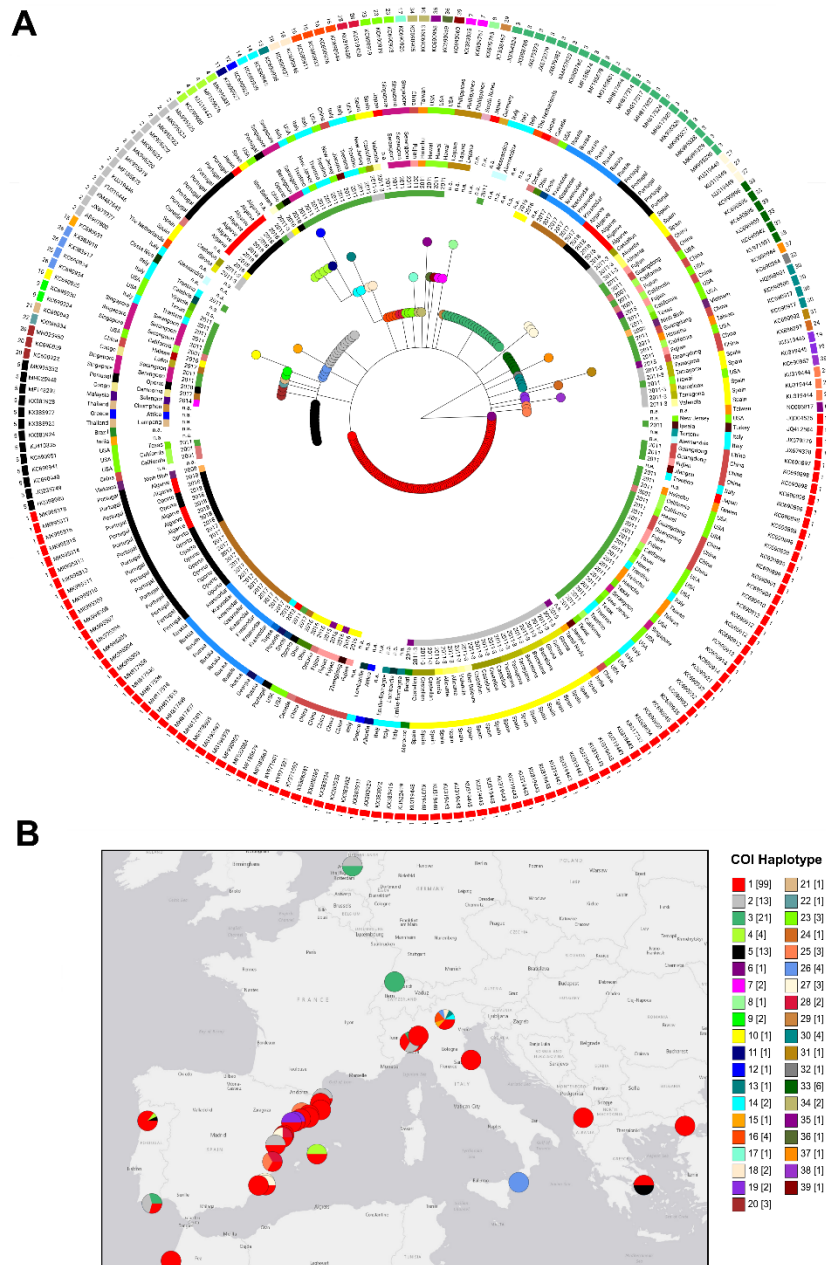

**Fig 1. Integration of mosquitoes detected in Portugal into the global *A. albopictus* COI-based genetic diversity. A.** Microreact Visualization of a maximum likelihood phylogenetic tree constructed based on 31 novel COI sequences obtained from mosquito circulating in Portugal plus 182 sequences available at GenBank (S1 Table). The colored external rings (from the outside in) indicate the COI haplotype/GenBank accession numbers, country, country region and year of collection. The tree nodes are colored according with the COI haplotype. For better tree visualization, the highly divergent VN103-9 strain haplotype 40 was excluded from the tree and the NC006817 sequence representative of mitogenome haplogroup A3 / COI haplotype 6 was used as root. **B.** Geospatial mapping of *A. albopictus* detected in the Portugal by COI haplotype in the context of the mosquito distribution in Europe region (plus Morocco). Of note, the geographical placement of circles (colored by haplotype distribution) in the map may not correspond to the exact location where mosquitoes were collected (refer to S1 Table for details about the used location) and the circles size does not correlate with number of sequences documented in each location. The internal region of the COI gene under comparison corresponds to positions 1511-2080 of the Rimini isolate 1 reference mitogenome (GenBank accession number KX383916). Phylogenetic and geospatial data were integrated using the freely available platform Microreact [51], with the map presented here being externally created with the open source website <https://landlook.usgs.gov/viewer.html>.

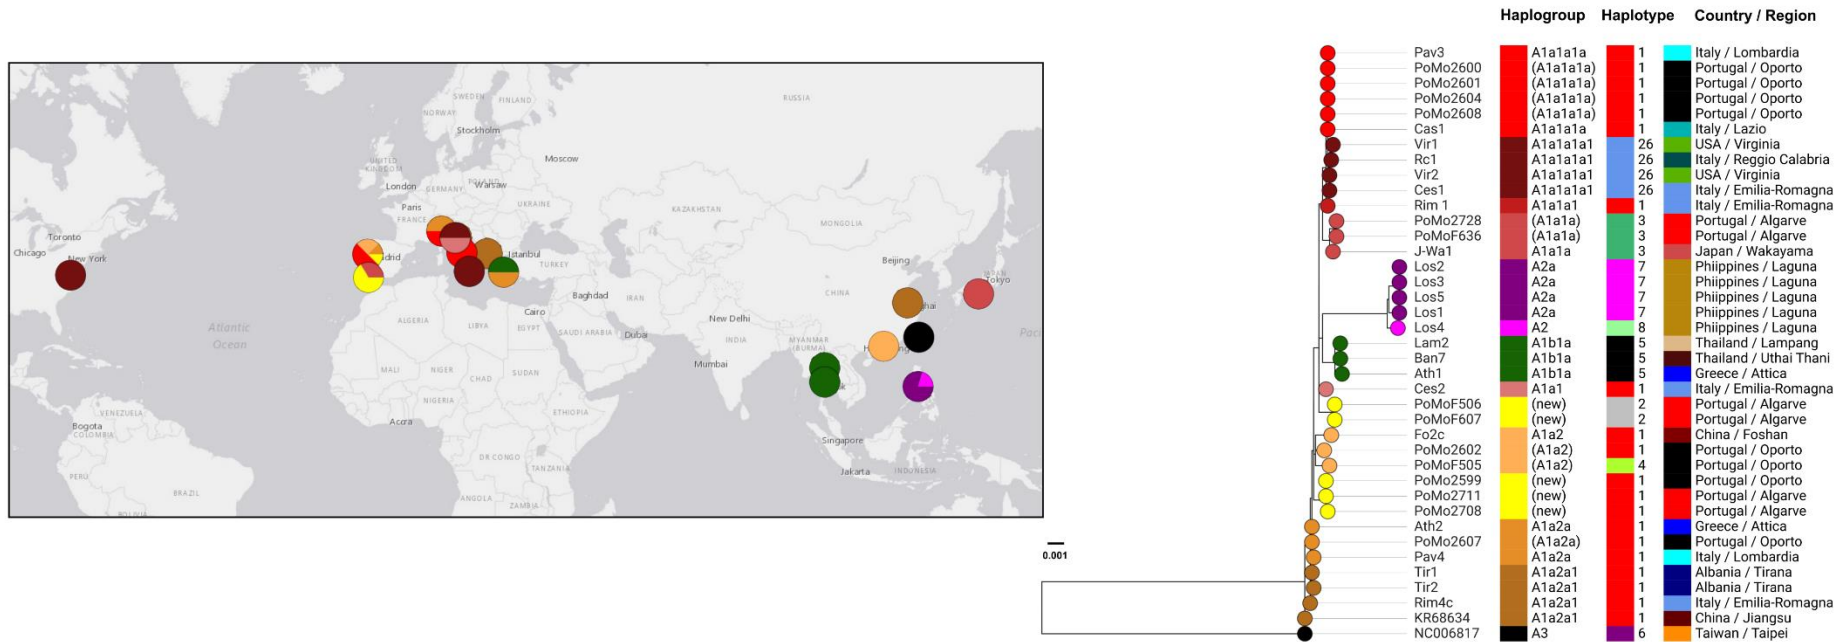

**Fig 2. Mitogenome-based phylogeographic analysis of mosquitos detected in Portugal.** The figure illustrates the integrative phylogenetic and geospatial analysis of 14 novel mitogenome sequences obtained from mosquito circulating in Portugal plus 25 sequences available in GenBank (S2 Table). The tree nodes are colored according with distinct mitogenome backgrounds (classified as haplogroup, according to Battaglia et al. [40] when possible). Colored blocks (from left to right) indicate the (inferred) haplogroup, COI haplotype and country / region of the 39 mitogenomes under comparison. Of note, inferred haplogroups are indicated within brackets (see details in S3 Table), where divergent sequences that do not present SNP/indel profiles of previously defined haplogroups representative are indicated as potentially “new” (in yellow) haplogroups (including one potentially novel haplogroup detected in Oporto region and another detected in both Oporto and Algarve regions). Of note, the geographical placement of circles (colored by inferred haplogroups) in the map may not correspond to the exact location where mosquitos were collected (refer to S2 Table 2 for details about the applied location). The internal region of the mitogenome sequence under comparison corresponds to positions 283-14653 of the Rimini isolate 1 reference mitogenome (GenBank accession number KX383916). The tree scale reflects the number of substitution *per* site in the 14400 bp alignment. Phylogenetic and geospatial data were integrated using the freely available platform Microreact [51], with the map presented here being externally created with the open source website <https://landlook.usgs.gov/viewer.html>.
